# Supplementary material
Source: ML conference proceedings conference paper supplement (https://openreview.net/forum?id=_Ko4kT3ckWy)
Supplement: supplementary_material [file attachment]

## A APPENDIX

### B NUMERICAL RESULTS PARAMETERS

All experiments were done on a computer with 32gb of RAM, a CPU Intel Core i9-9900K @3.60GHz x 16, a GPU GeForce RTX 2080 Ti/PCIe/SSE2, and Ubuntu 18.04.4 LTS.

#### B.1 RECOMMENDATION SYSTEM

We split the dataset with 90% for the training set, and 10% for the testing set, and we run 20 independent random partitions. For the optimizer, we used 5 samples for the batch size, and ADAM algorithm Kingma & Ba (2015), with learning rate 0.005,  $\beta_1 = 0.9$ ,  $\beta_2 = 0.999$ , and without learning rate decay. For the loss, we used the smooth  $L_1$  loss. For the GNN, we used ReLU as non-linearity, we considered  $F = 32$  features,  $K = 5$  filter taps, and  $L = 1$  layers.

We used the graph neural networks library available online at <https://github.com/alelab-upenn/graph-neural-networks/blob/master/examples/movieGNN.py> and implemented with PyTorch.

#### B.2 DECENTRALIZED CONTROL

We run the system for  $T = 2s$ , and used 400 samples for training, 20 for validation, and 20 for the test set. For the optimizer, we used 20 samples for the batch size, and ADAM algorithm Kingma & Ba (2015) with learning rate 0.0005,  $\beta_1 = 0.9$ ,  $\beta_2 = 0.999$ , without learning rate decay. We used a one layer Graph Neural Networks with  $F = 64$  hidden units and  $K = 3$  filter taps, and used the hyperbolic tangent as non-linearity  $\rho$ . We run 10 independent realizations of each experiment.

We used the graph neural networks library available online at <https://github.com/alelab-upenn/graph-neural-networks/blob/master/examples/flockingGNN.py> and implemented with PyTorch.

## C PROOF OF THEOREM 1

**Definition 2** (Template graphs). Let  $\{u_i\}_{i=1}^n$  be the regular  $n$ -partition of  $[0, 1]$ , i.e.,

$$u_i = \frac{i-1}{n} \quad (19)$$

for  $1 \leq i \leq n$ . The  $n$ -node template graph  $\mathbb{G}_n$ , whose GSO we denote  $\mathbb{S}_n$ , is obtained from  $\mathbf{W}$  as

$$[\mathbb{S}_n]_{ij} = \mathbf{W}(u_i, u_j) \quad (20)$$

for  $1 \leq i, j \leq n$ .

**Definition 3** (Graphon spectral representation of convolutional filter response). As the graphon  $\mathbf{W}$  is bounded and symmetric,  $T_{\mathbf{W}}$  is a self adjoint Hilbert-Schmidt operator, which allows to use the operator's spectral basis  $\mathbf{W}(u, v) = \sum_{i \in \mathbb{Z}_{\{0\}}} \lambda_i \psi_i(u) \psi_i(v)$ . Eigenvalues  $\lambda_i$  are ordered in decreasing order of absolute value i.e.,  $1 \geq \lambda_1 \geq \lambda_2 \geq \dots \geq 0 \geq \dots \geq \lambda_{-2} \geq \lambda_{-1} \geq -1$ , and their only accumulation point is 0 (Lax, 2002, Theorem 3, Chapter 28). Thus, we define the spectral representation of the convolutional filter  $T_{\mathbf{H}}$  (cf. (6)) as,

$$h(\lambda) = \sum_{k=0}^{K-1} h_k \lambda^k \quad (21)$$

**Definition 4** ( $c$ -band cardinality of  $\mathbf{W}$ ). The  $c$ -band cardinality, denoted  $B_{\mathbf{W}}^c$ , is the number of eigenvalues whose absolute value is larger than  $c$ .

$$B_{\mathbf{W}}^c = \#\{\lambda_i : \|\lambda_i\| \leq c\} \quad (22)$$

**Definition 5** ( $c$ -eigenvalue margin of  $\mathbf{W} - \mathbf{W}_n$ ). The  $c$ -eigenvalue margin of  $\mathbf{W} - \mathbf{W}_n$  is defined as the minimum distance between two different eigenvalues of the integral operator applied to  $\mathbf{W}$ , and to  $\mathbf{W}_n$  as follows,

$$\delta_{\mathbf{W}\mathbf{W}_n}^c = \min_{i,j \neq i} \{ \|\lambda_i(T_{\mathbf{W}}) - \lambda_i(T_{\mathbf{W}_n})\| : \|\lambda_i(T_{\mathbf{W}_n})\| \geq c \} \quad (23)$$

**Definition 6** (Graphon Convolutional Filter). Given a graphon  $\mathbf{W}$ , a graphon signal  $X$ , and filter coefficients  $\mathbf{h} = [h_0, \dots, h_{K-1}]$  the graphon filter  $T_{\mathbf{H}} : L_2([0, 1]) \rightarrow L_2([0, 1])$  is defined as,

$$(T_{\mathbf{H}}X)(v) = \sum_{k=0}^{K-1} h_k (T_{\mathbf{W}}^{(k)}X)(v). \quad (24)$$

**Proposition 1.** Let  $X \in L_2([0, 1])$  be a normalized Lipschitz graphon signal, and let  $X_n$  be the graphon signal induced by the graph signal  $\mathbf{x}_n$  obtained from  $X$  on the template graph  $\mathbb{G}_n$  [cf. Definition 2], i.e.,  $[\mathbf{x}_n]_i = X((i-1)/n)$  for  $1 \leq i \leq n$ . It holds that

$$\|X - X_n\|_{L_2} \leq \frac{1}{n}. \quad (25)$$

*Proof.* Let  $I_i = [(i-1)/n, i/n]$  for  $1 \leq i \leq n-1$  and  $I_n = [(n-1)/n, 1]$ . Since the graphon is normalized Lipschitz, for any  $u \in I_i$ ,  $1 \leq i \leq n$ , we have

$$\|X(u) - X_n(u)\| \leq \max \left( \left| u - \frac{i-1}{n} \right|, \left| \frac{i}{n} - u \right| \right) \leq \frac{1}{n}. \quad (26)$$

We can then write

$$\|X - X_n\|^2 = \int_0^1 |X(u) - X_n(u)|^2 du \quad (27)$$

$$\leq \int_0^1 \left( \frac{1}{n} \right)^2 du = \left( \frac{1}{n} \right)^2, \quad (28)$$

which completes the proof.  $\square$

**Proposition 2.** Let  $\mathbf{W} : [0, 1]^2 \rightarrow [0, 1]$  be a normalized Lipschitz graphon, and let  $\mathbb{W}_n := \mathbf{W}_{\mathbb{G}_n}$  be the graphon induced by the template graph  $\mathbb{G}_n$  generated from  $\mathbf{W}$  as in Definition 2. It holds that

$$\|\mathbf{W} - \mathbb{W}_n\| \leq \frac{2}{n}. \quad (29)$$

*Proof.* Let  $I_i = [(i-1)/n, i/n]$  for  $1 \leq i \leq n-1$  and  $I_n = [(n-1)/n, 1]$ . Since the graphon is Lipschitz, for any  $u \in I_i, v \in I_j, 1 \leq i, j \leq n$ , we have

$$\|\mathbf{W}(u, v) - \mathbb{W}_n(u, v)\| \leq \max \left( \left| u - \frac{i-1}{n} \right|, \left| \frac{i}{n} - u \right| \right) \quad (30)$$

$$+ \max \left( \left| v - \frac{j-1}{n} \right|, \left| \frac{j}{n} - v \right| \right) \quad (31)$$

$$\leq \frac{1}{n} + \frac{1}{n} = \frac{2}{n}. \quad (32)$$

We can then write

$$\|\mathbf{W} - \mathbb{W}_n\|^2 = \int_0^1 |\mathbf{W}(u, v) - \mathbb{W}_n(u, v)|^2 dudv \quad (33)$$

$$\leq \int_0^1 \left( \frac{2}{n} \right)^2 dudv = \left( \frac{2}{n} \right)^2 \quad (34)$$

which concludes the proof.  $\square$

**Proposition 3.** Consider the  $L$ -layer WNN given by  $Y = \Phi(X; \mathcal{H}, \mathbf{W})$ , where  $F_0 = F_L = 1$  and  $F_\ell = F$  for  $1 \leq \ell \leq L-1$ . Let  $c \in (0, 1]$  and assume that the graphon convolutions in all layers of this WNN have  $K$  filter taps [cf. (6)]. Under Assumptions 1 through 3, the norm of the gradient of the WNN with respect to its parameters  $\mathcal{H} = \{\mathbf{H}_{lk}\}_{l,k}$  can be upper bounded by,

$$\|\nabla_{\mathcal{H}} \Phi(X; \mathcal{H}, \mathbf{W})\| \leq F^{2L} \sqrt{K}. \quad (35)$$

*Proof.* We will find an upper bound for any element  $[\mathbf{H}_{l^\dagger k^\dagger}]_{g^\dagger f^\dagger}$  of the tensor  $\mathcal{H}$ . We start by the last layer of the WNN, applying the definition given in equation (8),

$$\|\nabla_{[\mathbf{H}_{l^\dagger k^\dagger}]_{g^\dagger f^\dagger}} \Phi(X; \mathcal{H}, \mathbf{W})\| = \left\| \nabla_{[\mathbf{H}_{l^\dagger k^\dagger}]_{g^\dagger f^\dagger}} X_L^f \right\| \quad (36)$$

$$= \left\| \nabla_{[\mathbf{H}_{l^\dagger k^\dagger}]_{g^\dagger f^\dagger}} \rho \left( \sum_{g=1}^{F_{l-1}} \sum_{k=1}^{K-1} (T_{\mathbf{W}}^{(k)} X_{l-1}^g) [\mathbf{H}_{Lk}]_{gf} \right) \right\|. \quad (37)$$

By Assumption 3, the non-linearity  $\rho$  is normalized Lipschitz, i.e.  $\nabla \rho(\cdot)(u) \leq 1$  for all  $u$ . Thus, applying the chain rule for the derivative, and the Cauchy-Schwartz inequality, the right hand side of the previous expression can be rewritten as,

$$\begin{aligned} \|\nabla_{[\mathbf{H}_{l^\dagger k^\dagger}]_{g^\dagger f^\dagger}} \Phi(X; \mathcal{H}, \mathbf{W})\| &= \left\| \nabla \rho \left( \sum_{g=1}^{F_{l-1}} \sum_{k=1}^{K-1} (T_{\mathbf{W}}^{(k)} X_{l-1}^g) [\mathbf{H}_{Lk}]_{gf} \right) \right\| \\ &\quad \left\| \nabla_{[\mathbf{H}_{l^\dagger k^\dagger}]_{g^\dagger f^\dagger}} \sum_{g=1}^{F_{l-1}} \sum_{k=1}^{K-1} (T_{\mathbf{W}}^{(k)} X_{l-1}^g) [\mathbf{H}_{Lk}]_{gf} \right\| \end{aligned} \quad (38)$$

$$\leq \left\| \nabla_{[\mathbf{H}_{l^\dagger k^\dagger}]_{g^\dagger f^\dagger}} \sum_{g=1}^{F_{l-1}} \sum_{k=1}^{K-1} (T_{\mathbf{W}}^{(k)} X_{l-1}^g) [\mathbf{H}_{Lk}]_{gf} \right\| \quad (39)$$

Note that the a larger bound will occur if  $l^\dagger < L-1$ , then by linearity of derivation, and the triangle inequality we obtain,

$$\|\nabla_{[\mathbf{H}_{l^\dagger k^\dagger}]_{g^\dagger f^\dagger}} \Phi(X; \mathcal{H}, \mathbf{W})\| \leq \sum_{g=1}^{F_{l-1}} \left\| \sum_{k=1}^{K-1} T_{\mathbf{W}}^{(k)} (\nabla_{[\mathbf{H}_{l^\dagger k^\dagger}]_{g^\dagger f^\dagger}} X_{l-1}^g) [\mathbf{H}_{Lk}]_{gf} \right\| \quad (40)$$

By Assumption 2, the convolutional filters are non-amplifying, thus it holds that,

$$\|\nabla_{[\mathbf{H}_{l^\dagger k^\dagger}]_{g^\dagger f^\dagger}} \Phi(X; \mathcal{H}, \mathbf{W})\| \leq \sum_{g=1}^{F_{l-1}} \left\| \nabla_{[\mathbf{H}_{l^\dagger k^\dagger}]_{g^\dagger f^\dagger}} X_{l-1}^g \right\| \quad (41)$$

Now note that as filters are non-amplifying, the maximum difference in the gradient will be attained at the first layer ( $l = 1$ ) of the WNN. Also note that the derivative of a convolutional filter  $T_{\mathbf{H}}$  [cf. Definition 6] at coefficient  $k^\dagger = i$ , is itself a convolutional filter with coefficients  $\mathbf{h}_i$ . The values of  $\mathbf{h}_i$  are  $[\mathbf{h}_i]_j = 1$  if  $j = i$  and 0 otherwise. Thence,

$$\|\nabla_{[\mathbf{H}_{l^\dagger k^\dagger}]_{g^\dagger f^\dagger}} \Phi(X; \mathcal{H}, \mathbf{W})\| \leq F^{L-1} \left\| \mathbf{h}_{i*} \mathbf{W} X_0 \right\| \quad (42)$$

$$\leq F^{L-1} \|X_0\|. \quad (43)$$

To complete the proof note that tensor  $\mathcal{H}$  has  $F^{L-1}K$  elements, and each individual gradient is upper bounded by (43), and  $\|X\|$  is normalized by Assumption 1.  $\square$

**Lemma 1.** Let  $\Phi(X; \mathcal{H}, \mathbf{W})$  be a WNN with  $F_0 = F_L = 1$ , and  $F_l = F$  for  $1 \leq l \leq L-1$ . Let  $c \in (0, 1]$ , and assume that the graphon convolutions in all layers of this WNN have  $K$  filter taps [cf. (6)]. Let  $\Phi(\mathbf{x}_n; \mathcal{H}, \mathbf{S}_n)$  be a GNN sampled from  $\Phi(X; \mathcal{H}, \mathbf{W})$  as in (9). Under assumptions (1),(2),(3), and (5) with probability  $1 - \xi$  it holds that,

$$\begin{aligned} \|\Phi(X; \mathcal{H}, \mathbf{W}) - \Phi(X_n; \mathcal{H}, \mathbf{W}_n)\| &\leq LF^{L-1} \left( 1 + \frac{\pi B_{\mathbf{W}_n}^c}{\delta_{\mathbf{W}\mathbf{W}_n}^c} \right) \frac{2 \left( 1 + \sqrt{n \log(\frac{2n}{\xi})} \right)}{n} \\ &\quad + \frac{1}{n} + 4LF^{L-1}c \end{aligned} \quad (44)$$

The fixed constants  $B_{\mathbf{W}}^c$  and  $\delta_{\mathbf{W}\mathbf{W}_n}^c$  are the  $c$ -band cardinality and the  $c$ -eigenvalue margin of  $\mathbf{W}$  and  $\mathbf{W}_n$  respectively [cf. Definitions 4,5].

*Proof.* We start by writing the expression on the left hand side, using the definition of WNN [cf. (8)] we can write,

$$\begin{aligned} \|\Phi(X; \mathcal{H}, \mathbf{W}) - \Phi(X_n; \mathcal{H}, \mathbf{W}_n)\| &= \|X_L - X_{nL}\| \quad (45) \\ &= \left\| \rho \left( \sum_{g=1}^{F_{L-1}} \sum_{k=1}^{K-1} (T_{\mathbf{W}}^{(k)} X_{L-1}^g) [\mathbf{H}_{Lk}]_{gf} \right) - \rho \left( \sum_{g=1}^{F_{L-1}} \sum_{k=1}^{K-1} (T_{\mathbf{W}_n}^{(k)} X_{nL-1}^g) [\mathbf{H}_{Lk}]_{gf} \right) \right\|. \end{aligned}$$

Since the non-linearity  $\rho$  is normalized Lipschitz by Assumption 3, using the triangle inequality, we obtain

$$\|X_L - X_{nL}\| \leq \sum_{g=1}^{F_{L-1}} \left\| \sum_{k=1}^{K-1} (T_{\mathbf{W}}^{(k)} X_{L-1}^g) [\mathbf{H}_{Lk}]_{gf} - \sum_{k=1}^{K-1} (T_{\mathbf{W}_n}^{(k)} X_{nL-1}^g) [\mathbf{H}_{Lk}]_{gf} \right\|. \quad (46)$$

Using the triangle inequality once again, we split the last inequality into two terms as follows,

$$\begin{aligned} \|X_L - X_{nL}\| &\leq \sum_{g=1}^{F_{L-1}} \left\| \sum_{k=1}^{K-1} T_{\mathbf{W}}^{(k)} (X_{L-1}^g - X_{nL-1}^g) [\mathbf{H}_{Lk}]_{gf} \right\| \quad \textbf{(1)} \\ &\quad + \sum_{g=1}^{F_{L-1}} \left\| \sum_{k=1}^{K-1} (T_{\mathbf{W}}^{(k)} - T_{\mathbf{W}_n}^{(k)}) X_{L-1}^g [\mathbf{H}_{Lk}]_{gf} \right\| \quad \textbf{(2)}. \end{aligned} \quad (47)$$

Where we have split (47) into terms **(1)**, and **(2)**. On the one hand, by assumption 2, convolutional filters  $h$  are non-amplifying, thus using Cauchy-Schwartz inequality, term **(1)** can be bounded by,

$$\sum_{g=1}^{F_{L-1}} \left\| \sum_{k=1}^{K-1} T_{\mathbf{W}}^{(k)} (X_{L-1}^g - X_{nL-1}^g) [\mathbf{H}_{Lk}]_{gf} \right\| \leq \sum_{g=1}^{F_{L-1}} \|X_{L-1}^g - X_{nL-1}^g\|. \quad (48)$$

To bound term **(2)**, denoting  $h_{Lgf}$  the spectral representation of the convolutional filter applied to  $X_{L-1}^g$  at feature  $f$  of layer  $L$  [cf. Definition 3], we will decompose the filter as follows,

$$h_{Lgf}^{\geq c}(\lambda) \begin{cases} 0 & \text{if } |\lambda| < c \\ h_{Lgf}(\lambda) - h_{Lgf}(c) & \text{if } |\lambda| \geq c \end{cases} \quad (49)$$

$$h_{Lgf}^{\leq c}(\lambda) \begin{cases} h_{Lgf}(\lambda) & \text{if } |\lambda| < c \\ h_{Lgf}(c) & \text{if } |\lambda| \geq c. \end{cases} \quad (50)$$

Note that  $h_{Lgf} = h_{Lgf}^{\geq c} + h_{Lgf}^{\leq c}$ . Let  $T_{[\mathbf{H}_L]_{gf}}^{\leq c}$  and  $T_{[\mathbf{H}_{nL}]_{gf}}^{\leq c}$ , be the graphon convolutional filters with filter function  $h_{Lgf}^{\leq c}$  on graphons  $\mathbf{W}$ , and  $\mathbf{W}_n$  respectively [cf. Definition 6]. Note that filter  $h_{Lgf}^{\leq c}$ , varies only in the interval  $[0, c)$ , and since filters are normalized Lipschitz by Assumption 2, it verifies

$$\left\| T_{[\mathbf{H}_L]_{gf}}^{\leq c} X_{L-1}^g - T_{[\mathbf{H}_{nL}]_{gf}}^{\leq c} X_{L-1}^g \right\| \leq \|(h_{Lgf}(c) + c) - (h_{Lgf}(c) - c)\| \|X_{L-1}^g\| \quad (51)$$

$$\leq 2c \|X_{L-1}^g\|. \quad (52)$$

Now we need to upper bound the difference in the high frequencies  $h_{Lgf}^{\geq c}$ . Let  $T_{[\mathbf{H}_L]_{gf}}^{\geq c}$  and  $T_{[\mathbf{H}_{nL}]_{gf}}^{\geq c}$ , be the graphon filters with filter function  $h_{Lgf}^{\geq c}$  on graphons  $\mathbf{W}$ , and  $\mathbf{W}_n$  respectively. Let  $\mathbb{S}_n$  denote the template graph sampled from the graphon  $\mathbf{W}$  [cf. definition 2]. We denote  $\mathbb{W}_n$ , the induced graphon by template graph  $\mathbb{S}_n$  as in (10). By introducing  $T_{[\mathbb{H}_{nL}]_{gf}}^{\geq c}$ , the graph filter with filter function  $h_{Lgf}^{\geq c}$  on graphon  $\mathbb{W}_n$ , we can use the triangle inequality to obtain,

$$\begin{aligned} \left\| T_{[\mathbf{H}_L]_{gf}}^{\geq c} X_{L-1}^g - T_{[\mathbf{H}_{nL}]_{gf}}^{\geq c} X_{L-1}^g \right\| &\leq \left\| T_{[\mathbf{H}_L]_{gf}}^{\geq c} X_{L-1}^g - T_{[\mathbb{H}_{nL}]_{gf}}^{\geq c} X_{L-1}^g \right\| \quad \textbf{(2.1)} \\ &+ \left\| T_{[\mathbb{H}_{nL}]_{gf}}^{\geq c} X_{L-1}^g - T_{[\mathbf{H}_{nL}]_{gf}}^{\geq c} X_{L-1}^g \right\| \quad \textbf{(2.2)}. \end{aligned} \quad (53)$$

Under assumptions 1–5, to bound term **(2.1)** we can use (Ruiz et al., 2020a, Theorem 1), and to bound term **(2.2)** we can use (Ruiz et al., 2020d, Lemma 2). Thus, with probability  $1 - \xi$ , the previous expression can be bounded by,

$$\left\| T_{[\mathbf{H}_L]_{gf}}^{\geq c} X_{L-1}^g - T_{[\mathbf{H}_{nL}]_{gf}}^{\geq c} X_{L-1}^g \right\| \leq \left( 1 + \frac{\pi B_{\mathbf{W}_n}^c}{\delta_{\mathbf{W}\mathbf{W}_n}^c} \right) \frac{2 \left( 1 + \sqrt{n \log(\frac{2n}{\xi})} \right)}{n} \|X_{L-1}^g\|. \quad (54)$$

Where the fixed constants  $B_{\mathbf{W}}^c$  and  $\delta_{\mathbf{W}\mathbf{W}_n}^c$  are the  $c$ -band cardinality and the  $c$ -eigenvalue margin of  $\mathbf{W}$  and  $\mathbf{W}_n$  respectively [cf. Definitions 4,5]. Hence, coming back to (47), we can use (48) to upper bound **(1)**, and we can use (52), and (54), to upper bound **(2)** as follows,

$$\begin{aligned} \|X_L - X_{nL}\| &\leq \sum_{g=1}^{F_{L-1}} \|X_{L-1}^g - X_{nL-1}^g\| + 2c \|X_{L-1}^g\| \\ &+ \left( 1 + \frac{\pi B_{\mathbf{W}_n}^c}{\delta_{\mathbf{W}\mathbf{W}_n}^c} \right) \frac{2 \left( 1 + \sqrt{n \log(\frac{2n}{\xi})} \right)}{n} \|X_{L-1}^g\|. \end{aligned} \quad (55)$$

Now, we arrive at a recursive equation that we can compute for the  $L$  layers, with  $F$  features per layer, to obtain,

$$\begin{aligned} \|X_L - X_{nL}\| &\leq F_0 \|X_0 - X_{n0}\| + 2LF^{L-1}c \|X_0\| \\ &+ LF^{L-1} \left( 1 + \frac{\pi B_{\mathbf{W}_n}^c}{\delta_{\mathbf{W}\mathbf{W}_n}^c} \right) \frac{2 \left( 1 + \sqrt{n \log(\frac{2n}{\xi})} \right)}{n} \|X_0\|. \end{aligned} \quad (56)$$

Using Proposition 1, noting that  $F_0 = 1$  by construction, and using Assumption 1, concludes the proof.  $\square$

**Lemma 2.** Let  $\Phi(X; \mathcal{H}, \mathbf{W})$  be a WNN with  $F_0 = F_L = 1$ , and  $F_l = F$  for  $1 \leq l \leq L-1$ . Let  $c \in (0, 1]$ , and assume that the graphon convolutions in all layers of this WNN have  $K$  filter taps [cf. (6)]. Let  $\Phi(\mathbf{x}_n; \mathcal{H}, \mathbf{S}_n)$  be a GNN sampled from  $\Phi(X; \mathcal{H}, \mathbf{W})$  as in (9). Under assumptions (1),(2),(3), and (5) with probability  $1 - \xi$  it holds that,

$$\begin{aligned} & \|\nabla_{\mathcal{H}} \Phi(X; \mathcal{H}, \mathbf{W}) - \nabla_{\mathcal{H}} \Phi(X_n; \mathcal{H}, \mathbf{W}_n)\| \\ & \leq \sqrt{KF^{L-1}} \left( 2L^2 F^{2L-2} \left( 1 + \frac{\pi B_{\mathbf{W}_n}^c}{\delta_{\mathbf{W}_n}^c} \right) \frac{2 \left( 1 + \sqrt{n \log(\frac{2n}{\xi})} \right)}{n} \right. \\ & \quad \left. + \frac{2F^{L-1}L}{n} + 8L^2 F^{2L-2} c \right). \end{aligned}$$

*Proof.* We will first show that the gradient with respect to any arbitrary element  $[\mathbf{H}_{l^\dagger k^\dagger}]_{g^\dagger f^\dagger} \in \mathbb{R}$  of  $\mathcal{H}$  can be uniformly bounded. Note that the maximum is attained if  $l^\dagger = 1$ . Without loss of generality, assuming  $l^\dagger > l-1$ , we can begin by using the definition given in equation (8) of the output of the WNN as follows,

$$\begin{aligned} & \|\nabla_{[\mathbf{H}_{l^\dagger k^\dagger}]_{g^\dagger f^\dagger}} \Phi(X; \mathcal{H}, \mathbf{W}) - \nabla_{[\mathbf{H}_{l^\dagger k^\dagger}]_{g^\dagger f^\dagger}} \Phi(X_n; \mathcal{H}, \mathbf{W}_n)\| \\ & = \|\nabla_{[\mathbf{H}_{l^\dagger k^\dagger}]_{g^\dagger f^\dagger}} X_L^f - \nabla_{[\mathbf{H}_{l^\dagger k^\dagger}]_{g^\dagger f^\dagger}} X_{nL}^f\| \end{aligned} \quad (57)$$

$$\begin{aligned} & = \left\| \nabla_{[\mathbf{H}_{l^\dagger k^\dagger}]_{g^\dagger f^\dagger}} \rho \left( \sum_{g=1}^{F_{l-1}} \sum_{k=1}^{K-1} (T_{\mathbf{W}}^{(k)} X_{l-1}^g) [\mathbf{H}_{lk}]_{gf} \right) \right. \\ & \quad \left. - \nabla_{[\mathbf{H}_{l^\dagger k^\dagger}]_{g^\dagger f^\dagger}} \rho \left( \sum_{g=1}^{F_{l-1}} \sum_{k=1}^{K-1} (T_{\mathbf{W}_n}^{(k)} X_{nl-1}^g) [\mathbf{H}_{lk}]_{gf} \right) \right\|. \end{aligned} \quad (58)$$

Taking derivatives by applying the chain rule, and applying the triangle inequality it yields,

$$\begin{aligned} & \|\nabla_{[\mathbf{H}_{l^\dagger k^\dagger}]_{g^\dagger f^\dagger}} X_L^f - \nabla_{[\mathbf{H}_{l^\dagger k^\dagger}]_{g^\dagger f^\dagger}} X_{nL}^f\| \\ & \leq \left\| \left( \nabla \rho \left( \sum_{g=1}^{F_{l-1}} \sum_{k=1}^{K-1} (T_{\mathbf{W}}^{(k)} X_{l-1}^g) [\mathbf{H}_{lk}]_{gf} \right) - \nabla \rho \left( \sum_{g=1}^{F_{l-1}} \sum_{k=1}^{K-1} (T_{\mathbf{W}_n}^{(k)} X_{nl-1}^g) [\mathbf{H}_{lk}]_{gf} \right) \right) \right. \\ & \quad \left. \nabla_{[\mathbf{H}_{l^\dagger k^\dagger}]_{g^\dagger f^\dagger}} \left( \sum_{g=1}^{F_{l-1}} \sum_{k=1}^{K-1} (T_{\mathbf{W}}^{(k)} X_{l-1}^g) [\mathbf{H}_{lk}]_{gf} \right) \right\| \end{aligned} \quad (59)$$

$$+ \left\| \nabla \rho \left( \sum_{g=1}^{F_{l-1}} \sum_{k=1}^{K-1} (T_{\mathbf{W}_n}^{(k)} X_{nl-1}^g) [\mathbf{H}_{lk}]_{gf} \right) \right\| \quad (60)$$

$$\left( \nabla_{[\mathbf{H}_{l^\dagger k^\dagger}]_{g^\dagger f^\dagger}} \sum_{g=1}^{F_{l-1}} \sum_{k=1}^{K-1} (T_{\mathbf{W}}^{(k)} X_{l-1}^g) [\mathbf{H}_{lk}]_{gf} - \nabla_{[\mathbf{H}_{l^\dagger k^\dagger}]_{g^\dagger f^\dagger}} \sum_{g=1}^{F_{l-1}} \sum_{k=1}^{K-1} (T_{\mathbf{W}_n}^{(k)} X_{nl-1}^g) [\mathbf{H}_{lk}]_{gf} \right) \Big\|.$$

We can now use Cauchy-Schwartz inequality, Assumptions 3, 4, and Proposition 3 to bound the terms regarding the gradient of the non-linearity  $\rho$ , the loss function  $\ell$ , and the WNN respectively, as follows,

$$\begin{aligned} & \|\nabla_{[\mathbf{H}_{l^\dagger k^\dagger}]_{g^\dagger f^\dagger}} X_L^f - \nabla_{[\mathbf{H}_{l^\dagger k^\dagger}]_{g^\dagger f^\dagger}} X_{nL}^f\| \\ & \leq \left\| \sum_{g=1}^{F_{l-1}} \sum_{k=1}^{K-1} (T_{\mathbf{W}}^{(k)} X_{l-1}^g) [\mathbf{H}_{lk}]_{gf} - \sum_{g=1}^{F_{l-1}} \sum_{k=1}^{K-1} (T_{\mathbf{W}_n}^{(k)} X_{nl-1}^g) [\mathbf{H}_{lk}]_{gf} \right\| F^{L-1} \|X_0\| \\ & \quad + \left\| \sum_{g=1}^{F_{l-1}} \nabla_{[\mathbf{H}_{l^\dagger k^\dagger}]_{g^\dagger f^\dagger}} \sum_{k=1}^{K-1} \left( (T_{\mathbf{W}}^{(k)} X_{l-1}^g) [\mathbf{H}_{lk}]_{gf} - (T_{\mathbf{W}_n}^{(k)} X_{nl-1}^g) [\mathbf{H}_{lk}]_{gf} \right) \right\|. \end{aligned} \quad (61)$$

We can now apply the triangle inequality on the second term of the previous bound to obtain,

$$\begin{aligned}
& \|\nabla_{[\mathbf{H}_{l^\dagger k^\dagger}]_{g^\dagger f^\dagger}} X_L^f - \nabla_{[\mathbf{H}_{l^\dagger k^\dagger}]_{g^\dagger f^\dagger}} X_{nL}^f\| \\
& \leq \left\| \sum_{g=1}^{F_{l-1}} \sum_{k=1}^{K-1} (T_{\mathbf{W}}^{(k)} X_{l-1}^g) [\mathbf{H}_{lk}]_{gf} - \sum_{g=1}^{F_{l-1}} \sum_{k=1}^{K-1} (T_{\mathbf{W}_n}^{(k)} X_{nl-1}^g) [\mathbf{H}_{lk}]_{gf} \right\| F^{L-1} \|X_0\| \\
& + \left\| \sum_{g=1}^{F_{l-1}} \nabla_{[\mathbf{H}_{l^\dagger k^\dagger}]_{g^\dagger f^\dagger}} \sum_{k=1}^{K-1} \left( (T_{\mathbf{W}}^{(k)}) [\mathbf{H}_{lk}]_{gf} - (T_{\mathbf{W}_n}^{(k)}) [\mathbf{H}_{lk}]_{gf} \right) X_{nl-1}^g \right\| \\
& + \sum_{g=1}^{F_{l-1}} \left\| \nabla_{[\mathbf{H}_{l^\dagger k^\dagger}]_{g^\dagger f^\dagger}} \sum_{k=1}^{K-1} T_{\mathbf{W}_n}^{(k)} \left( X_{l-1}^g - X_{nl-1}^g \right) [\mathbf{H}_{lk}]_{gf} \right\|.
\end{aligned} \tag{62}$$

Now note that as we are considering the case in which  $l^\dagger < l-1$ , using Cauchy-Schwartz inequality, we can use the same bound for the first and second term of the right hand side of the previous inequality. Since filters are non-expansive by Assumption 3, it yields

$$\begin{aligned}
& \|\nabla_{[\mathbf{H}_{l^\dagger k^\dagger}]_{g^\dagger f^\dagger}} X_L^f - \nabla_{[\mathbf{H}_{l^\dagger k^\dagger}]_{g^\dagger f^\dagger}} X_{nL}^f\| \\
& \leq 2 \left\| \sum_{g=1}^{F_{l-1}} \sum_{k=1}^{K-1} (T_{\mathbf{W}}^{(k)} X_{l-1}^g) [\mathbf{H}_{lk}]_{gf} - \sum_{g=1}^{F_{l-1}} \sum_{k=1}^{K-1} (T_{\mathbf{W}_n}^{(k)} X_{nl-1}^g) [\mathbf{H}_{lk}]_{gf} \right\| F^{L-1} \|X_0\| \\
& + \sum_{g=1}^{F_{l-1}} \left\| \nabla_{[\mathbf{H}_{l^\dagger k^\dagger}]_{g^\dagger f^\dagger}} \left( X_{l-1}^g - X_{nl-1}^g \right) \right\|.
\end{aligned} \tag{63}$$

Now notice, that the only term that remains to bound is the exact same bound we obtained in equation (57), but on the previous layer  $L-2$ . Hence, we conclude that by applying the same steps  $L-2$  times, as the WNN has  $L$  layers, we will obtain a bound for any element  $[\mathbf{H}_{l^\dagger k^\dagger}]_{g^\dagger f^\dagger}$  of tensor  $\mathcal{H}$ .

$$\begin{aligned}
& \|\nabla_{[\mathbf{H}_{l^\dagger k^\dagger}]_{g^\dagger f^\dagger}} X_L^f - \nabla_{[\mathbf{H}_{l^\dagger k^\dagger}]_{g^\dagger f^\dagger}} X_{nL}^f\| \\
& \leq 2LF^{L-2} \left\| \sum_{g=1}^{F_{l-1}} \sum_{k=1}^{K-1} (T_{\mathbf{W}}^{(k)} X_{l-1}^g) [\mathbf{H}_{lk}]_{gf} - \sum_{g=1}^{F_{l-1}} \sum_{k=1}^{K-1} (T_{\mathbf{W}_n}^{(k)} X_{nl-1}^g) [\mathbf{H}_{lk}]_{gf} \right\| F^{L-1} \|X_0\| \\
& + \sum_{g=1}^{F_{l-1}} \left\| \nabla_{[\mathbf{H}_{l^\dagger k^\dagger}]_{g^\dagger f^\dagger}} \left( X_1^g - X_n^g \right) \right\|.
\end{aligned} \tag{64}$$

Note that the derivative of a convolutional filter  $T_{\mathbf{H}}$  at coefficient  $k^\dagger = i$ , is itself a convolutional filter with coefficients  $\mathbf{h}_i$  [cf. Definition 6]. The values of  $\mathbf{h}_i$  are  $[\mathbf{h}_i]_j = 1$  if  $j = i$  and 0 otherwise. As  $\mathbf{h}_i$  is itself a filter that verifies Assumption 2, as graphons are normalized. Thus, considering  $l^\dagger = 0$ , and using Propositions 1, 2, (Chung & Radcliffe, 2011, Theorem 1) and the triangle inequality, we obtain,

$$\left\| \mathbf{h}_{i*} \mathbf{W}_n X_{n0} - \mathbf{h}_{i*} \mathbf{W} X_0 \right\| \leq \left( \|\mathbf{W} - \mathbb{W}_n\| + \|\mathbb{W}_n - \mathbf{W}_n\| \right) \|X_0\| + \|X_{n0} - X_0\| \tag{65}$$

$$\leq \left( 1 + \frac{\pi B_{\mathbf{W}_n}^c}{\delta_{\mathbf{W}\mathbf{W}_n}^c} \right) \frac{2 \left( 1 + \sqrt{n \log \left( \frac{2n}{\xi} \right)} \right)}{n} + \frac{1}{n} \tag{66}$$

with probability  $1 - \xi$ . In the previous expression,  $\mathbb{W}_n$  is the template graphon [cf. Definition 2]. Now, substituting (64) into (65), and using Lemma 1, with probability  $1 - \xi$ , it holds that,

$$\begin{aligned}
\|\nabla_{[\mathbf{H}_{l^\dagger k^\dagger}]_{g^\dagger f^\dagger}} X_L^f - \nabla_{[\mathbf{H}_{l^\dagger k^\dagger}]_{g^\dagger f^\dagger}} X_{nL}^f\| & \leq 2L^2 F^{2L-2} \left( 1 + \frac{\pi B_{\mathbf{W}_n}^c}{\delta_{\mathbf{W}\mathbf{W}_n}^c} \right) \frac{2 \left( 1 + \sqrt{n \log \left( \frac{2n}{\xi} \right)} \right)}{n} \\
& + \frac{2F^{L-1}L}{n} + 8L^2 F^{2L-2} c.
\end{aligned} \tag{67}$$

To achieve the final result, note that tensor  $\mathcal{H}$  has  $KF^{L-1}$  elements, and each individual gradient is upper bounded by (67).  $\square$

**Lemma 3.** Let  $\Phi(X; \mathcal{H}, \mathbf{W})$  be a WNN with  $F_0 = F_L = 1$ , and  $F_l = F$  for  $1 \leq l \leq L-1$ . Let  $c \in (0, 1]$ , and assume that the graphon convolutions in all layers of this WNN have  $K$  filter taps [cf. (6)]. Let  $\Phi(\mathbf{x}_n; \mathcal{H}, \mathbf{S}_n)$  be a GNN sampled from  $\Phi(X; \mathcal{H}, \mathbf{W})$  as in (9). Under Assumptions (1)–(5) with probability  $1 - \xi$  it holds that,

$$\begin{aligned} & \|\nabla_{\mathcal{H}} \ell(Y, \Phi(X; \mathcal{H}, \mathbf{W})) - \nabla_{\mathcal{H}} \ell(Y_n, \Phi(X_n; \mathcal{H}, \mathbf{W}_n))\| \\ & \leq \sqrt{KF^{L-1}} \left( 3L^2 F^{2L-2} \left( 1 + \frac{\pi B_{\mathbf{W}_n}^c}{\delta_{\mathbf{W}\mathbf{W}_n}^c} \right) \frac{2 \left( 1 + \sqrt{n \log(\frac{2n}{\xi})} \right)}{n} \right. \\ & \quad \left. + \frac{4F^{L-1}L}{n} + 12L^2 F^{2L-2} c \right) \end{aligned}$$

*Proof.* In order to analyze the norm of the gradient with respect to the tensor  $\mathcal{H}$ , we can start by taking the derivative with respect to a single element of the tensor,  $[\mathbf{H}_{l^\dagger k^\dagger}]_{g^\dagger f^\dagger}$ . By deriving the loss function  $\ell$  using the chain rule it yields,

$$\begin{aligned} & \|\nabla_{[\mathbf{H}_{l^\dagger k^\dagger}]_{g^\dagger f^\dagger}} \ell(Y, \Phi(X; \mathcal{H}, \mathbf{W})) - \nabla_{[\mathbf{H}_{l^\dagger k^\dagger}]_{g^\dagger f^\dagger}} \ell(Y_n, \Phi(X_n; \mathcal{H}, \mathbf{W}_n))\| \\ & = \|\nabla \ell(Y, \Phi(X; \mathcal{H}, \mathbf{W})) \nabla_{[\mathbf{H}_{l^\dagger k^\dagger}]_{g^\dagger f^\dagger}} \Phi(X; \mathcal{H}, \mathbf{W}) \\ & \quad - \nabla \ell(Y_n, \Phi(X_n; \mathcal{H}, \mathbf{W}_n)) \nabla_{[\mathbf{H}_{l^\dagger k^\dagger}]_{g^\dagger f^\dagger}} \Phi(X_n; \mathcal{H}, \mathbf{W}_n)\|. \end{aligned} \quad (68)$$

By Cauchy-Schwartz, and the triangle inequality it holds,

$$\begin{aligned} & \|\nabla_{[\mathbf{H}_{l^\dagger k^\dagger}]_{g^\dagger f^\dagger}} \ell(Y, \Phi(X; \mathcal{H}, \mathbf{W})) - \nabla_{[\mathbf{H}_{l^\dagger k^\dagger}]_{g^\dagger f^\dagger}} \ell(Y_n, \Phi(X_n; \mathcal{H}, \mathbf{W}_n))\| \\ & \leq \|\nabla \ell(Y, \Phi(X; \mathcal{H}, \mathbf{W})) - \nabla \ell(Y_n, \Phi(X_n; \mathcal{H}, \mathbf{W}_n))\| \|\nabla_{[\mathbf{H}_{l^\dagger k^\dagger}]_{g^\dagger f^\dagger}} \Phi(X; \mathcal{H}, \mathbf{W})\| \\ & \quad + \|\nabla \ell(Y_n, \Phi(X_n; \mathcal{H}, \mathbf{W}_n))\| \|\nabla_{[\mathbf{H}_{l^\dagger k^\dagger}]_{g^\dagger f^\dagger}} \Phi(X; \mathcal{H}, \mathbf{W}) - \nabla_{[\mathbf{H}_{l^\dagger k^\dagger}]_{g^\dagger f^\dagger}} \Phi(X_n; \mathcal{H}, \mathbf{W}_n)\|. \end{aligned} \quad (69)$$

By the triangle inequality and Assumption 4 it follows,

$$\begin{aligned} & \|\nabla_{[\mathbf{H}_{l^\dagger k^\dagger}]_{g^\dagger f^\dagger}} \ell(Y, \Phi(X; \mathcal{H}, \mathbf{W})) - \nabla_{[\mathbf{H}_{l^\dagger k^\dagger}]_{g^\dagger f^\dagger}} \ell(Y_n, \Phi(X_n; \mathcal{H}, \mathbf{W}_n))\| \\ & \leq \|\nabla \ell(Y, \Phi(X; \mathcal{H}, \mathbf{W})) - \nabla \ell(Y, \Phi(X_n; \mathcal{H}, \mathbf{W}_n))\| \|\nabla_{[\mathbf{H}_{l^\dagger k^\dagger}]_{g^\dagger f^\dagger}} \Phi(X; \mathcal{H}, \mathbf{W})\| \end{aligned} \quad (70)$$

$$\|\nabla \ell(Y_n, \Phi(X_n; \mathcal{H}, \mathbf{W}_n)) - \nabla \ell(Y, \Phi(X_n; \mathcal{H}, \mathbf{W}_n))\| \|\nabla_{[\mathbf{H}_{l^\dagger k^\dagger}]_{g^\dagger f^\dagger}} \Phi(X; \mathcal{H}, \mathbf{W})\| \quad (71)$$

$$\begin{aligned} & + \|\nabla_{[\mathbf{H}_{l^\dagger k^\dagger}]_{g^\dagger f^\dagger}} \Phi(X; \mathcal{H}, \mathbf{W}) - \nabla_{[\mathbf{H}_{l^\dagger k^\dagger}]_{g^\dagger f^\dagger}} \Phi(X_n; \mathcal{H}, \mathbf{W}_n)\| \\ & \leq (\|Y_n - Y\| + \|\Phi(X_n; \mathcal{H}, \mathbf{W}_n) - \Phi(X; \mathcal{H}, \mathbf{W})\|) \|\nabla_{[\mathbf{H}_{l^\dagger k^\dagger}]_{g^\dagger f^\dagger}} \Phi(X; \mathcal{H}, \mathbf{W})\| \\ & + \|\nabla_{[\mathbf{H}_{l^\dagger k^\dagger}]_{g^\dagger f^\dagger}} \Phi(X; \mathcal{H}, \mathbf{W}) - \nabla_{[\mathbf{H}_{l^\dagger k^\dagger}]_{g^\dagger f^\dagger}} \Phi(X_n; \mathcal{H}, \mathbf{W}_n)\|. \end{aligned} \quad (72)$$

Now we can use Lemmas 1–2, Propositions 1, and 3, and Assumption 1 to obtain,

$$\begin{aligned} & \|\nabla_{[\mathbf{H}_{l^\dagger k^\dagger}]_{g^\dagger f^\dagger}} \ell(Y, \Phi(X; \mathcal{H}, \mathbf{W})) - \nabla_{[\mathbf{H}_{l^\dagger k^\dagger}]_{g^\dagger f^\dagger}} \ell(Y_n, \Phi(X_n; \mathcal{H}, \mathbf{W}_n))\| \\ & \leq \left( 3L^2 F^{2L-2} \left( 1 + \frac{\pi B_{\mathbf{W}_n}^c}{\delta_{\mathbf{W}\mathbf{W}_n}^c} \right) \frac{2 \left( 1 + \sqrt{n \log(\frac{2n}{\xi})} \right)}{n} \right. \\ & \quad \left. + \frac{4F^{L-1}L}{n} + 12L^2 F^{2L-2} c \right) \end{aligned} \quad (73)$$

Noting that tensor  $\mathcal{H}$  has  $KF^{L-1}$  elements, and each individual term can be bounded by (73), the desired result is attained.  $\square$

**Definition 7.** We define the constant  $\gamma$  as,

$$\gamma = 12\sqrt{KF^{L-1}}L^2F^{2L-2}, \quad (74)$$

where  $K$  is the number of features,  $L$  is the number of layers, and  $K$  is the number of filter taps of the GNN.



We will present a more comprehensive statement of Theorem 1, where we include all the smaller order terms in (15). Notice that the statement of Theorem 1 in the main body of the paper omits these terms in order to simplify the exposition of the main result. In practice, these smaller order terms vanish faster as  $n$  increases.

**Theorem 1.** Consider the ERM problem in (12) and let  $\Phi(X; \mathcal{H}, \mathbf{W})$  be an  $L$ -layer WNN with  $F_0 = F_L = 1$ , and  $F_l = F$  for  $1 \leq l \leq L-1$ . Let  $c \in (0, 1]$  and assume that the graphon convolutions in all layers of this WNN have  $K$  filter taps [cf. (6)]. Let  $\Phi(\mathbf{x}_n; \mathcal{H}, \mathbf{S}_n)$  be a GNN sampled from  $\Phi(X; \mathcal{H}, \mathbf{W})$  as in (9). Under assumptions AS1–AS5, it holds that

$$\begin{aligned} & \mathbb{E}[\|\nabla_{\mathcal{H}}\ell(Y, \Phi(X; \mathcal{H}, \mathbf{W})) - \nabla_{\mathcal{H}}\ell(Y_n, \Phi(X_n; \mathcal{H}, \mathbf{W}_n))\|] \\ & \leq \sqrt{KF^{L-1}} \left( 6L^2 F^{2L-2} \left( 1 + \frac{\pi B_{\mathbf{W}_n}^c}{\delta_{\mathbf{W}\mathbf{W}_n}^c} \right) \frac{\left( 1 + \sqrt{n \log(2n^{3/2})} \right)}{n} \right. \\ & \quad \left. + \frac{4F^{L-1}L}{n} + 12L^2 F^{2L-2}c \right) + \frac{2F^{2L}\sqrt{K}}{\sqrt{n}} \end{aligned} \quad (75)$$

where  $Y_n$  is the graphon signal induced by  $[\mathbf{y}_n]_i = Y(u_i)$ ,  $u_i = (i-1)/n$  for  $1 \leq i \leq n$  [cf. (10)]. The fixed constants  $B_{\mathbf{W}}^c$  and  $\delta_{\mathbf{W}\mathbf{W}_n}^c$  are the  $c$ -band cardinality and the  $c$ -eigenvalue margin of  $\mathbf{W}$  and  $\mathbf{W}_n$  respectively [cf. Definitions 4,5 in the supplementary material].

*Proof of Theorem 1.* We begin by considering the event  $A_n$  such that,

$$\begin{aligned} A_n = & \left( \|\nabla_{\mathcal{H}}\ell(Y, \Phi(X; \mathcal{H}, \mathbf{W})) - \nabla_{\mathcal{H}}\ell(Y_n, \Phi(X_n; \mathcal{H}, \mathbf{W}_n))\| \right. \\ & \leq \sqrt{KF^{L-1}} \left( 3L^2 F^{2L-2} \left( 1 + \frac{\pi B_{\mathbf{W}_n}^c}{\delta_{\mathbf{W}\mathbf{W}_n}^c} \right) \frac{2 \left( 1 + \sqrt{n \log(\frac{2n}{\xi})} \right)}{n} \right. \\ & \quad \left. \left. + \frac{4F^{L-1}L}{n} + 12L^2 F^{2L-2}c \right) \right). \end{aligned} \quad (76)$$

Thus, by considering the disjoint events  $A_n$ , and  $A_n^c$ , and denoting  $\mathbf{1}(\cdot)$  the indicator function, the expectation can be separated as follows,

$$\begin{aligned} & \mathbb{E}[\|\nabla_{\mathcal{H}}\ell(Y, \Phi(X; \mathcal{H}, \mathbf{W})) - \nabla_{\mathcal{H}}\ell(Y_n, \Phi(X_n; \mathcal{H}, \mathbf{W}_n))\|] \\ & = \mathbb{E}[\|\nabla_{\mathcal{H}}\ell(Y, \Phi(X; \mathcal{H}, \mathbf{W})) - \nabla_{\mathcal{H}}\ell(Y_n, \Phi(X_n; \mathcal{H}, \mathbf{W}_n))\| \mathbf{1}(A_n)] \\ & \quad + \mathbb{E}[\|\nabla_{\mathcal{H}}\ell(Y, \Phi(X; \mathcal{H}, \mathbf{W})) - \nabla_{\mathcal{H}}\ell(Y_n, \Phi(X_n; \mathcal{H}, \mathbf{W}_n))\| \mathbf{1}(A_n^c)] \end{aligned} \quad (77)$$

We can bound the term regarding  $A_n^c$  using the chain rule, Cauchy-Schwartz inequality, Assumption 4, and Proposition 3 as follows,

$$\begin{aligned} & \|\nabla_{\mathcal{H}}\ell(Y, \Phi(X; \mathcal{H}, \mathbf{W})) - \nabla_{\mathcal{H}}\ell(Y_n, \Phi(X_n; \mathcal{H}, \mathbf{W}_n))\| \\ & \leq \|\nabla_{\mathcal{H}}\ell(Y, \Phi(X; \mathcal{H}, \mathbf{W}))\| + \|\nabla_{\mathcal{H}}\ell(Y_n, \Phi(X_n; \mathcal{H}, \mathbf{W}_n))\| \end{aligned} \quad (78)$$

$$\begin{aligned} & \leq \|\nabla\ell(Y, \Phi(X; \mathcal{H}, \mathbf{W}))\| \|\nabla_{\mathcal{H}}\Phi(X; \mathcal{H}, \mathbf{W})\| \\ & \quad + \|\nabla\ell(Y_n, \Phi(X_n; \mathcal{H}, \mathbf{W}_n))\| \|\nabla_{\mathcal{H}}\Phi(X_n; \mathcal{H}, \mathbf{W}_n)\| \end{aligned} \quad (79)$$

$$\leq \|\nabla_{\mathcal{H}}\Phi(X; \mathcal{H}, \mathbf{W})\| + \|\nabla_{\mathcal{H}}\Phi(X_n; \mathcal{H}, \mathbf{W}_n)\| \quad (80)$$

$$\leq 2F^{2L}\sqrt{K} \quad (81)$$

Returning to equation (77), we can substitute the bound obtained in equation (81), and by taking  $P(A_n) = 1 - \xi$ , and using Lemma 3, it yields,

$$\begin{aligned} & \mathbb{E}[\|\nabla_{\mathcal{H}}\ell(Y, \Phi(X; \mathcal{H}, \mathbf{W})) - \nabla_{\mathcal{H}}\ell(Y_n, \Phi(X_n; \mathcal{H}, \mathbf{W}_n))\|] \\ & \leq (1 - \xi) \sqrt{KF^{L-1}} \left( 3L^2 F^{2L-2} \left( 1 + \frac{\pi B_{\mathbf{W}_n}^c}{\delta_{\mathbf{W}\mathbf{W}_n}^c} \right) \frac{2 \left( 1 + \sqrt{n \log(\frac{2n}{\xi})} \right)}{n} \right. \\ & \quad \left. + \frac{4F^{L-1}L}{n} + 12L^2 F^{2L-2}c \right) + \xi 2F^{2L}\sqrt{K} \end{aligned} \quad (82)$$

To complete the proof, set  $\xi = \frac{1}{\sqrt{n}}$ . □

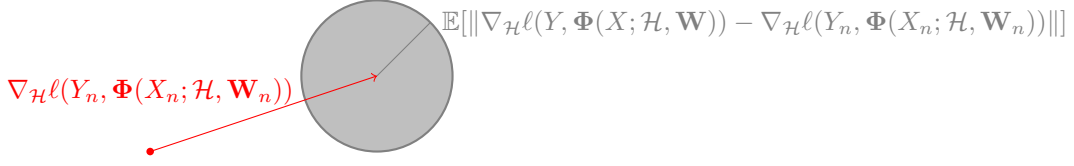

Figure 3: In order to satisfy the property that the inner product between the gradient on the GNN  $\nabla_{\mathcal{H}}\ell(Y_n, \Phi(X_n; \mathcal{H}, \mathbf{W}_n))$  and the gradient on the graphon  $\nabla_{\mathcal{H}}\ell(Y, \Phi(X; \mathcal{H}, \mathbf{W}))$  is positive, we rely on the condition provided in Theorem 2.

## D PROOF OF THEOREM 2

**Definition 8** (Stopping time). We define the stopping time  $k^*$  as,

$$k^* = \min_{k \geq 0} \{\|\nabla_{\mathcal{H}}\Phi(X; \mathcal{H}_k, \mathbf{W}_n)\| \leq \sqrt{KF^{L-1}}12L^2F^{2L-2}c\}. \quad (83)$$

**Definition 9** (Constant  $\psi$ ).

**Lemma 4.** Under Assumptions 4, 5, and 6, the gradient of the loss function  $\ell$  with respect to the parameters of the GNN  $\mathcal{H}$  is  $A_{\nabla\ell}$ -Lipschitz,

$$\|\nabla_{\mathcal{H}}\ell(Y, \Phi(X; \mathcal{A}, \mathbf{W})) - \nabla_{\mathcal{H}}\ell(Y, \Phi(X; \mathcal{B}, \mathbf{W}))\| \leq A_{\nabla\ell}\|\mathcal{A} - \mathcal{B}\| \quad (84)$$

where  $A_{\nabla\ell} = (A_{\nabla\Phi} + A_{\Phi}F^{2L}\sqrt{K})$ .

*Proof.* To begin with, we can apply the chain rule to obtain,

$$\begin{aligned} & \|\nabla_{\mathcal{H}}\ell(Y, \Phi(X; \mathcal{A}, \mathbf{W})) - \nabla_{\mathcal{H}}\ell(Y, \Phi(X; \mathcal{B}, \mathbf{W}))\| \\ &= \|\nabla\ell(Y, \Phi(X; \mathcal{A}, \mathbf{W}))\nabla_{\mathcal{H}}\Phi(X; \mathcal{A}, \mathbf{W}) - \nabla\ell(Y, \Phi(X; \mathcal{B}, \mathbf{W}))\nabla_{\mathcal{H}}\Phi(X; \mathcal{B}, \mathbf{W})\| \end{aligned} \quad (85)$$

By applying the triangle inequality, and Cauchy-Schwartz it yields,

$$\begin{aligned} & \|\nabla_{\mathcal{H}}\ell(Y, \Phi(X; \mathcal{A}, \mathbf{W})) - \nabla_{\mathcal{H}}\ell(Y, \Phi(X; \mathcal{B}, \mathbf{W}))\| \\ & \leq \|\nabla\ell(Y, \Phi(X; \mathcal{A}, \mathbf{W}))\| \|\nabla_{\mathcal{H}}\Phi(X; \mathcal{A}, \mathbf{W}) - \nabla_{\mathcal{H}}\Phi(X; \mathcal{B}, \mathbf{W})\| \\ & \quad + \|\nabla_{\mathcal{H}}\ell(Y, \Phi(X; \mathcal{A}, \mathbf{W})) - \nabla_{\mathcal{H}}\ell(Y, \Phi(X; \mathcal{B}, \mathbf{W}))\| \|\nabla_{\mathcal{H}}\Phi(X; \mathcal{B}, \mathbf{W})\| \end{aligned} \quad (86)$$

We can now use Assumptions 1, 4, 5, and 6 as well as Proposition 3, to obtain

$$\|\nabla_{\mathcal{H}}\ell(Y, \Phi(X; \mathcal{A}, \mathbf{W})) - \nabla_{\mathcal{H}}\ell(Y, \Phi(X; \mathcal{B}, \mathbf{W}))\| \leq (A_{\nabla\Phi} + A_{\Phi}F^{2L}\sqrt{K})\|\mathcal{A} - \mathcal{B}\| \quad (87)$$

Completing the proof.  $\square$

**Lemma 5.** Consider the ERM problem in (12) and let  $\Phi(X; \mathcal{H}, \mathbf{W})$  be an  $L$ -layer WNN with  $F_0 = F_L = 1$ , and  $F_l = F$  for  $1 \leq l \leq L-1$ . Let  $c \in (0, 1]$  and assume that the graphon convolutions in all layers of this WNN have  $K$  filter taps [cf. (6)]. Let  $\Phi(\mathbf{x}_n; \mathcal{H}, \mathbf{S}_n)$  be a GNN sampled from  $\Phi(X; \mathcal{H}, \mathbf{W})$  as in (9). Under assumptions AS1–AS6, let the following condition be satisfied for every  $k$ ,

$$\begin{aligned} & \sqrt{K}L^{L-1} \left( 6L^2F^{2L-2} \left( 1 + \frac{\pi B_{\mathbf{W}_n}^c}{\delta_{\mathbf{W}_n}^c} \right) \frac{\left( 1 + \sqrt{n \log(2n^{3/2})} \right)}{n} + \frac{4F^{L-1}L}{n} + 12L^2F^{2L-2}c \right) \\ & + \frac{2F^{2L}\sqrt{K}}{\sqrt{n}} < \frac{1 - A_{\nabla\ell}\eta_k}{2} \|\nabla_{\mathcal{H}}\ell(Y_n, \Phi(X_n; \mathcal{H}_k, \mathbf{W}_n))\|. \end{aligned} \quad (88)$$

then the first  $k^*$  iterates generated by equation (14),  $\mathbf{1}(k \leq k^*)\ell(Y, \Phi(X; \mathcal{H}_k, \mathbf{W}_n))$  form a positive super-martingale with respect to the filtration  $\mathcal{F}_k$  generated by the history of the Algorithm up to step  $k$  [i.e.,  $\{X, Y, X_n, Y_n, \mathbf{W}_n\}_k, \{X, Y, X_n, Y_n, \mathbf{W}_n\}_{k-1}, \dots, \{X, Y, X_n, Y_n, \mathbf{W}_n\}_0$ ]. Where  $k^*$  is the stopping time defined in Definition 8, and  $\mathbf{1}(\cdot)$  is the indicator function.

*Proof.* To begin with,  $\mathbf{1}(k < k^*)\ell(Y, \Phi(X; \mathcal{H}_k, \mathbf{W})) \in \mathcal{F}_k$ , where  $\mathcal{F}_k$  is the filtration generated by the history of the Algorithm up to  $k$ . Note that the loss function  $\ell$  is positive by Assumption 4. It remains to be shown the inequality expression of the super-martingale. For  $k > k^*$ , the inequality is trivially verified as the indicator function  $\mathbf{1}(k \leq k^*) = 0$  for  $k > k^*$ . For  $k \leq k^*$ , as in Bertsekas & Tsitsiklis (2000), we define a continuous function  $g(\epsilon)$  that takes the value of the loss function on the Graphon data on iteration  $k + 1$  at  $\epsilon = 1$ , and on iteration  $k$  on  $\epsilon = 0$  as follows,

$$g(\epsilon) = \ell(Y, \Phi(X; \mathcal{H}_k - \epsilon\eta_k \nabla_{\mathcal{H}} \ell(Y_n, \Phi(X_n; \mathcal{H}_k, \mathbf{W}_n)), \mathbf{W})). \quad (89)$$

Note that function  $g(\epsilon)$ , is evaluated on the graphon data  $Y, X, \mathbf{W}$ , but the steps are controlled by the induced graphon data  $Y_n, X_n, \mathbf{W}_n$ . Applying the chain rule, the derivative of  $g(\epsilon)$  with respect to  $\epsilon$  can be obtain as follows,

$$\begin{aligned} \frac{\partial}{\partial \epsilon} g(\epsilon) = \\ - \nabla_{\mathcal{H}} \ell(Y, \Phi(X; \mathcal{H}_k - \epsilon\eta_k \nabla_{\mathcal{H}} \ell(Y_n, \Phi(X_n; \mathcal{H}_k, \mathbf{W}_n)), \mathbf{W})) \eta_k \nabla_{\mathcal{H}} \ell(Y_n, \Phi(X_n; \mathcal{H}_k, \mathbf{W}_n)). \end{aligned} \quad (90)$$

Now note that the difference in the loss function  $\ell$  between iterations  $k + 1$  and  $k$  can be written as the difference between  $g(\epsilon = 1)$  and  $g(\epsilon = 0)$  as follows,

$$g(1) - g(0) = \ell(Y, \Phi(X; \mathcal{H}_{k+1}, \mathbf{W})) - \ell(Y, \Phi(X; \mathcal{H}_k, \mathbf{W})). \quad (91)$$

Computing the integration of the derivative of  $g(\epsilon)$  between  $[0, 1]$  it yields

$$\ell(Y, \Phi(X; \mathcal{H}_{k+1}, \mathbf{W})) - \ell(Y, \Phi(X; \mathcal{H}_k, \mathbf{W})) = g(1) - g(0) = \int_0^1 \frac{\partial}{\partial \epsilon} g(\epsilon) d\epsilon \quad (92)$$

$$\begin{aligned} = \int_0^1 \nabla_{\mathcal{H}} \ell(Y, \Phi(X; \mathcal{H}_k - \epsilon\eta_k \nabla_{\mathcal{H}} \ell(Y_n, \Phi(X_n; \mathcal{H}_k, \mathbf{W}_n)), \mathbf{W})) \\ (-)\eta_k \nabla_{\mathcal{H}} \ell(Y_n, \Phi(X_n; \mathcal{H}_k, \mathbf{W}_n)) d\epsilon. \end{aligned} \quad (93)$$

Note that the last term of the previous integral does not depend on  $\epsilon$ . Besides, we can sum and subtract  $\nabla_{\mathcal{H}} \ell(Y, \Phi(\mathcal{H}_k, \mathbf{W}, X))$  inside the integral, to obtain,

$$\begin{aligned} & \ell(Y, \Phi(X; \mathcal{H}_{k+1}, \mathbf{W})) - \ell(Y, \Phi(X; \mathcal{H}_k, \mathbf{W})) \\ &= (-)\eta_k \nabla_{\mathcal{H}} \ell(Y_n, \Phi(X_n; \mathcal{H}_k, \mathbf{W}_n)) \\ & \int_0^1 \nabla_{\mathcal{H}} \ell(Y, \Phi(X; \mathcal{H}_k - \epsilon\eta_k \nabla_{\mathcal{H}} \ell(Y_n, \Phi(X_n; \mathcal{H}_k, \mathbf{W}_n)), \mathbf{W})) \\ & \quad + \nabla_{\mathcal{H}} \ell(Y, \Phi(X; \mathcal{H}_k, \mathbf{W})) - \nabla_{\mathcal{H}} \ell(Y, \Phi(X; \mathcal{H}_k, \mathbf{W})) d\epsilon \\ &= -\eta_k \nabla_{\mathcal{H}} \ell(Y_n, \Phi(X_n; \mathcal{H}_k, \mathbf{W}_n)) \nabla_{\mathcal{H}} \ell(Y, \Phi(X; \mathcal{H}_k, \mathbf{W})) \int_0^1 d\epsilon \\ & \quad - \eta_k \nabla_{\mathcal{H}} \ell(Y_n, \Phi(X_n; \mathcal{H}_k, \mathbf{W}_n)) \int_0^1 \nabla_{\mathcal{H}} \ell(Y, \Phi(\mathcal{H}_k - \epsilon\eta_k \nabla_{\mathcal{H}} \ell(Y_n, \Phi(X_n; \mathcal{H}_k, \mathbf{W}_n)), \mathbf{W}, X)) \\ & \quad - \nabla_{\mathcal{H}} \ell(Y, \Phi(X; \mathcal{H}_k, \mathbf{W})) d\epsilon. \end{aligned} \quad (94)$$

$$\begin{aligned} & \quad - \nabla_{\mathcal{H}} \ell(Y, \Phi(X; \mathcal{H}_k, \mathbf{W})) d\epsilon. \end{aligned} \quad (95)$$

We can now apply the Cauchy-Schwartz inequality to the last term on the previous inequality, and take the norm of the integral, which is smaller that the integral of the norm to obtain,

$$\begin{aligned} & \ell(Y, \Phi(X; \mathcal{H}_{k+1}, \mathbf{W})) - \ell(Y, \Phi(X; \mathcal{H}_k, \mathbf{W})) \\ & \leq -\eta_k \nabla_{\mathcal{H}} \ell(Y_n, \Phi(\mathcal{H}_k; \mathbf{W}_n; X_n)) \nabla_{\mathcal{H}} \ell(Y, \Phi(\mathcal{H}_k, \mathbf{W}, X)) \\ & \quad + \eta_k \|\nabla_{\mathcal{H}} \ell(Y_n, \Phi(\mathcal{H}_k; \mathbf{W}_n; X_n))\| \int_0^1 \left\| \nabla_{\mathcal{H}} \ell(Y, \Phi(\mathcal{H}_k - \epsilon\eta_k \nabla_{\mathcal{H}} \ell(Y_n, \Phi(\mathcal{H}_k; \mathbf{W}_n; X_n)), \mathbf{W}, X)) \right. \\ & \quad \left. - \nabla_{\mathcal{H}} \ell(Y, \Phi(\mathcal{H}_k, \mathbf{W}, X)) \right\| d\epsilon. \end{aligned} \quad (96)$$

Under Lemma 4, we can take the Lipschitz bound on the gradient on the loss function with respect to the parameters, using  $A_{\nabla\ell}$ , to obtain,

$$\begin{aligned} & \ell(Y, \Phi(X; \mathcal{H}_{k+1}, \mathbf{W})) - \ell(Y, \Phi(X; \mathcal{H}_k, \mathbf{W})) \\ & \leq -\eta_k \nabla_{\mathcal{H}} \ell(Y_n, \Phi(X_n; \mathcal{H}_k, \mathbf{W}_n)) \nabla_{\mathcal{H}} \ell(Y, \Phi(X; \mathcal{H}_k, \mathbf{W})) \\ & \quad + A_{\nabla\ell} \eta_k \|\nabla_{\mathcal{H}} \ell(Y_n, \Phi(X_n; \mathcal{H}_k, \mathbf{W}_n))\| \int_0^1 \left\| \eta_k \nabla_{\mathcal{H}} \ell(Y_n, \Phi(X_n; \mathcal{H}_k, \mathbf{W}_n)) \right\| \epsilon d\epsilon \end{aligned} \quad (97)$$

$$\begin{aligned} & \leq -\eta_k \nabla_{\mathcal{H}} \ell(Y_n, \Phi(X_n; \mathcal{H}_k, \mathbf{W}_n)) \nabla_{\mathcal{H}} \ell(Y, \Phi(X; \mathcal{H}_k, \mathbf{W})) \\ & \quad + \frac{\eta_k^2 A_{\nabla\ell}}{2} \|\nabla_{\mathcal{H}} \ell(Y_n, \Phi(X_n; \mathcal{H}_k, \mathbf{W}_n))\|^2. \end{aligned} \quad (98)$$

Instead of evaluating the internal product between the gradient on the graphon, and induced graphon, we will use Theorem 1, to bound their expected difference (cf. Figure 3 for intuition). We can add and subtract the gradient of the loss function on the induced graphon  $\nabla_{\mathcal{H}} \ell(Y_n, \Phi(\mathcal{H}_k; \mathbf{W}_n; X_n))$ , and use the Cauchy-Schwartz inequality to obtain,

$$\begin{aligned} & \ell(Y, \Phi(X; \mathcal{H}_{k+1}, \mathbf{W})) - \ell(Y, \Phi(X; \mathcal{H}_k, \mathbf{W})) \\ & \leq -\eta_k \nabla_{\mathcal{H}} \ell(Y_n, \Phi(X_n; \mathcal{H}_k, \mathbf{W}_n)) \\ & \quad (\nabla_{\mathcal{H}} \ell(Y, \Phi(X; \mathcal{H}_k, \mathbf{W})) + \nabla_{\mathcal{H}} \ell(Y_n, \Phi(X_n; \mathcal{H}_k, \mathbf{W}_n)) - \nabla_{\mathcal{H}} \ell(Y_n, \Phi(X_n; \mathcal{H}_k, \mathbf{W}_n))) \\ & \quad + \frac{\eta_k^2 A_{\nabla\Phi}}{2} \|\nabla_{\mathcal{H}} \ell(Y_n, \Phi(X_n; \mathcal{H}_k, \mathbf{W}_n))\|^2 \end{aligned} \quad (99)$$

$$\begin{aligned} & \leq -\eta_k \|\nabla_{\mathcal{H}} \ell(Y_n, \Phi(X_n; \mathcal{H}_k, \mathbf{W}_n))\|^2 \\ & \quad + \eta_k \|\nabla_{\mathcal{H}} \ell(Y_n, \Phi(X_n; \mathcal{H}_k, \mathbf{W}_n))\| \|\nabla_{\mathcal{H}} \ell(Y, \Phi(X; \mathcal{H}_k, \mathbf{W})) - \nabla_{\mathcal{H}} \ell(Y_n, \Phi(X_n; \mathcal{H}_k, \mathbf{W}_n))\| \\ & \quad + \frac{\eta_k^2 A_{\nabla\Phi}}{2} \|\nabla_{\mathcal{H}} \ell(Y_n, \Phi(X_n; \mathcal{H}_k, \mathbf{W}_n))\|^2. \end{aligned} \quad (100)$$

We can rearrange the previous expression, to obtain,

$$\begin{aligned} & \eta_k \|\nabla_{\mathcal{H}} \ell(Y_n, \Phi(X_n; \mathcal{H}_k, \mathbf{W}_n))\|^2 \left( 1 - \frac{A_{\nabla\ell} \eta_k}{2} \right. \\ & \quad \left. - \frac{\|\nabla_{\mathcal{H}} \ell(Y, \Phi(X; \mathcal{H}_k, \mathbf{W})) - \nabla_{\mathcal{H}} \ell(Y_n, \Phi(X_n; \mathcal{H}_k, \mathbf{W}_n))\|}{\|\nabla_{\mathcal{H}} \ell(Y_n, \Phi(X_n; \mathcal{H}_k, \mathbf{W}_n))\|} \right) \\ & \leq \ell(Y, \Phi(X; \mathcal{H}_k, \mathbf{W})) - \ell(Y, \Phi(X; \mathcal{H}_{k+1}, \mathbf{W})). \end{aligned} \quad (101)$$

We can now take the conditional expectation with respect to the filtration  $\mathcal{F}_n$  to obtain,

$$\begin{aligned} & \mathbb{E}[\ell(Y, \Phi(X; \mathcal{H}_{k+1}, \mathbf{W})) | \mathcal{F}_k] \\ & \leq \eta_k \|\nabla_{\mathcal{H}} \ell(Y_n, \Phi(X_n; \mathcal{H}_k, \mathbf{W}_n))\|^2 \left( 1 - \frac{A_{\nabla\ell} \eta_k}{2} \right. \\ & \quad \left. - \mathbb{E} \left[ \frac{\|\nabla_{\mathcal{H}} \ell(Y, \Phi(X; \mathcal{H}_k, \mathbf{W})) - \nabla_{\mathcal{H}} \ell(Y_n, \Phi(X_n; \mathcal{H}_k, \mathbf{W}_n))\|}{\|\nabla_{\mathcal{H}} \ell(Y_n, \Phi(X_n; \mathcal{H}_k, \mathbf{W}_n))\|} \middle| \mathcal{F}_k \right] \right) \\ & \quad + \ell(Y, \Phi(X; \mathcal{H}_k, \mathbf{W})). \end{aligned} \quad (102)$$

As step size  $\eta_k > 0$ , and by definition norms are non-negative, using Theorem 1, as condition (88) holds for  $k \leq k^*$ , then

$$\mathbb{E}[\ell(Y, \Phi(X; \mathcal{H}_{k+1}, \mathbf{W})) | \mathcal{F}_k] \leq \ell(Y, \Phi(X; \mathcal{H}_k, \mathbf{W})). \quad (103)$$

By definition of super-martingale as in Durrett (2019), we complete the proof.  $\square$

**Lemma 6.** Consider the ERM problem in (12) and let  $\Phi(X; \mathcal{H}, \mathbf{W})$  be an  $L$ -layer WNN with  $F_0 = F_L = 1$ , and  $F_l = F$  for  $1 \leq l \leq L - 1$ . Let  $c \in (0, 1]$  and assume that the graphon convolutions in all layers of this WNN have  $K$  filter taps [cf. (6)]. Let  $\Phi(\mathbf{x}_n; \mathcal{H}, \mathbf{S}_n)$  be a GNN

sampled from  $\Phi(X; \mathcal{H}, \mathbf{W})$  as in (9). Under assumptions AS1–AS6, for any  $\epsilon \in (0, 1 - A_{\nabla \ell} \eta)$ , if the iterates generated by (14), satisfy,

$$\begin{aligned} & \sqrt{KL^{L-1}} \left( 6L^2 F^{2L-2} \left( 1 + \frac{\pi B_{\mathbf{W}_n}^c}{\delta_{\mathbf{W}\mathbf{W}_n}^c} \right) \frac{\left( 1 + \sqrt{n \log(2n^{3/2})} \right)}{n} + \frac{4F^{L-1}L}{n} + 12L^2 F^{2L-2} c \right) \\ & + \frac{2F^{2L} \sqrt{K}}{\sqrt{n}} < \frac{1 - A_{\nabla \ell} \eta_k - \epsilon}{2} \|\nabla_{\mathcal{H}} \ell(Y_n, \Phi(X_n; \mathcal{H}_k, \mathbf{W}_n))\|. \end{aligned} \quad (104)$$

then the expected value of the stopping time  $k^*$  [cf. Definition 8], is finite, i.e.,

$$\mathbb{E}[k^*] = \mathcal{O}(1/\epsilon) \quad (105)$$

*Proof.* Given the iterates at  $k = k^*$ , and the initial values at  $k = 0$ , we can express the expected difference between the loss  $\ell$ , as the summation over the difference of iterates as follows,

$$\begin{aligned} & \mathbb{E}[\ell(Y, \Phi(X; \mathcal{H}_0, \mathbf{W})) - \ell(Y, \Phi(X; \mathcal{H}_{k^*}, \mathbf{W}))] = \\ & \mathbb{E} \left[ \sum_{k=1}^{k^*} \ell(Y, \Phi(X; \mathcal{H}_{k-1}, \mathbf{W})) - \ell(Y, \Phi(X; \mathcal{H}_k, \mathbf{W})) \right] \end{aligned} \quad (106)$$

Taking the expected value with respect to the final iterate  $k = k^*$ , we get,

$$\begin{aligned} & \mathbb{E} \left[ \ell(Y, \Phi(X; \mathcal{H}_{k^0}, \mathbf{W})) - \ell(Y, \Phi(X; \mathcal{H}_{k^*}, \mathbf{W})) \right] \\ & = \mathbb{E}_{k^*} \left[ \mathbb{E} \left[ \sum_{k=1}^{k^*} \ell(Y, \Phi(X; \mathcal{H}_{k-1}, \mathbf{W})) - \ell(Y, \Phi(X; \mathcal{H}_k, \mathbf{W})) \right] \middle| k^* \right] \\ & = \sum_{t=0}^{\infty} \mathbb{E} \left[ \sum_{k=1}^t \ell(Y, \Phi(X; \mathcal{H}_{k-1}, \mathbf{W})) - \ell(Y, \Phi(X; \mathcal{H}_k, \mathbf{W})) \right] P(k^* = t) \end{aligned} \quad (107)$$

$$(108)$$

Using condition (104), and Lemma 5 for any  $k \leq k^*$ , it verifies

$$\mathbb{E} \left[ \ell(Y, \Phi(X; \mathcal{H}_{k-1}, \mathbf{W})) - \ell(Y, \Phi(X; \mathcal{H}_k, \mathbf{W})) \right] \geq \eta(\sqrt{KF^{L-1}} 12L^2 F^{2L-2} c)^2 \epsilon \quad (109)$$

Thus, coming back to (108),

$$\mathbb{E} \left[ \ell(Y, \Phi(X; \mathcal{H}_{k^0}, \mathbf{W})) - \ell(Y, \Phi(X; \mathcal{H}_{k^*}, \mathbf{W})) \right] \geq \eta(\sqrt{KF^{L-1}} 12L^2 F^{2L-2} c)^2 \epsilon \sum_{t=0}^{\infty} t P(k^* = t) \quad (110)$$

$$\geq \eta(\sqrt{KF^{L-1}} 12L^2 F^{2L-2} c)^2 \epsilon \mathbb{E}[k^*] \quad (111)$$

Note that as the loss function  $\ell$  is non-negative,

$$\frac{\mathbb{E} \left[ \ell(Y, \Phi(X; \mathcal{H}_{k^0}, \mathbf{W})) \right]}{\eta(\sqrt{KF^{L-1}} 12L^2 F^{2L-2} c)^2 \epsilon} \geq \mathbb{E}[k^*] \quad (112)$$

Thus concluding that  $k^* = \mathcal{O}(1/\epsilon)$ .  $\square$

**Theorem 2.** Consider the ERM problem in (12) and let  $\Phi(X; \mathcal{H}, \mathbf{W})$  be an  $L$ -layer WNN with  $F_0 = F_L = 1$ , and  $F_l = F$  for  $1 \leq l \leq L-1$ . Let  $c \in (0, 1]$  and assume that the graphon convolutions in all layers of this WNN have  $K$  filter taps [cf. (6)]. Let  $\Phi(\mathbf{x}_n; \mathcal{H}, \mathbf{S}_n)$  be a GNN sampled from  $\Phi(X; \mathcal{H}, \mathbf{W})$  as in (9). Consider the iterates generated by equation (14). Under

Assumptions AS1-AS6, for any fixed  $\epsilon \in (0, 1 - A_{\nabla\ell}\eta)$ , if at each step  $k$  the number of nodes  $n$  is picked such that it verifies

$$\begin{aligned} & \sqrt{KL^{L-1}} \left( 6L^2 F^{2L-2} \left( 1 + \frac{\pi B_{\mathbf{W}_n}^c}{\delta_{\mathbf{W}\mathbf{W}_n}^c} \right) \frac{\left( 1 + \sqrt{n \log(2n^{3/2})} \right)}{n} + \frac{4F^{L-1}L}{n} + 12L^2 F^{2L-2}c \right) \\ & + \frac{2F^{2L}\sqrt{K}}{\sqrt{n}} < \frac{1 - A_{\nabla\ell}\eta_k - \epsilon}{2} \|\nabla_{\mathcal{H}}\ell(Y_n, \Phi(X_n; \mathcal{H}_k, \mathbf{W}_n))\|. \end{aligned} \quad (113)$$

then in finite time we will achieve an iterate  $k^*$  such that the coefficients  $\mathcal{H}_{k^*}$  satisfy

$$\mathbb{E}[\|\nabla_{\mathcal{H}}\ell(Y, \Phi(X; \mathcal{H}_{k^*}, \mathbf{W}))\|] \leq 24\sqrt{KF^{L-1}}L^2F^{2L-2}c \quad \text{with probability 1} \quad (114)$$

where  $A_{\nabla\ell\eta_k} = (A_{\nabla\Phi} + A_{\Phi}F^{2L}\sqrt{K})$ .

*Proof.* We can use Lemma 6, to conclude that it must be the case that  $P(k^* = \infty) = 0$ , which implies that,  $P(k^* < \infty) = 1$ . Using stopping time  $k^*$  condition [cf. Definition 8] and the triangle inequality, it yields,

$$\begin{aligned} \mathbb{E}[\|\nabla_{\mathcal{H}}\ell(Y, \Phi(X; \mathcal{H}_{k^*}, \mathbf{W}))\|] & \leq \|\nabla_{\mathcal{H}}\ell(Y_n, \Phi(X_n; \mathcal{H}_{k^*}, \mathbf{W}_n))\| \\ & + \mathbb{E}[\|\nabla_{\mathcal{H}}\ell(Y_n, \Phi(X; \mathcal{H}_{k^*}, \mathbf{W}_n)) - \nabla_{\mathcal{H}}\ell(Y, \Phi(X_n; \mathcal{H}_{k^*}, \mathbf{W}_n))\|] \end{aligned} \quad (115)$$

Note that the iterates are constructed such that, for every  $k$

$$\mathbb{E}[\|\nabla_{\mathcal{H}}\ell(Y_n, \Phi(X; \mathcal{H}_k, \mathbf{W}_n)) - \nabla_{\mathcal{H}}\ell(Y, \Phi(X_n; \mathcal{H}_k, \mathbf{W}_n))\|] \leq \|\nabla_{\mathcal{H}}\ell(Y_n, \Phi(X; \mathcal{H}_k, \mathbf{W}_n))\|. \quad (116)$$

Using the stopping time condition, the final result is attained as follows

$$\mathbb{E}[\|\nabla_{\mathcal{H}}\ell(Y, \Phi(X; \mathcal{H}_{k^*}, \mathbf{W}))\|] \leq 2\|\nabla_{\mathcal{H}}\ell(Y_n, \Phi(X; \mathcal{H}_{k^*}, \mathbf{W}_n))\| \quad (117)$$

$$\leq 24\sqrt{KF^{L-1}}L^2F^{2L-2}c. \quad (118)$$

□
